## Effect of exercise training on vascular function and endothelial repair in heart failure with preserved ejection fraction: results from the OptimEx trial

A. Gevaert<sup>1</sup>, B. Boehm<sup>2</sup>, H. Hartmann<sup>3</sup>, I. Goovaerts<sup>4</sup>, T. Stoop<sup>4</sup>, C.M. Van De Heyning<sup>1</sup>, P.J. Beckers<sup>5</sup>, F. Baldassari<sup>6</sup>, S. Mueller<sup>6</sup>, A. Duvinage<sup>6</sup>, U. Wisloff<sup>7</sup>, V. Adams<sup>8</sup>, B. Pieske<sup>3</sup>, M. Halle<sup>6</sup>, E.M. Van Craenenbroeck<sup>1</sup>

<sup>1</sup>University of Antwerp, Research Group Cardiovascular Diseases, GENCOR Department, Antwerp, Belgium; <sup>2</sup>Technical University of Munich, Department of Preventive Pediatrics, Munich, Germany; <sup>3</sup>Charite Universitätsmedizin Berlin, Department Internal Medicine and Cardiology, Campus Virchow Klinikum, Berlin, Germany; <sup>4</sup>University Hospital Antwerp, Department of Cardiology, Antwerp, Belgium; <sup>5</sup>University of Antwerp, Antwerp, Belgium; <sup>6</sup>Technical University of Munich, Center for Prevention, Sports Medicine and Sports Cardiology, Munich, Germany; <sup>7</sup>Norwegian University of Science and Technology, Trondheim, Norway; <sup>8</sup>Heart Centre Dresden, Dresden, Germany

On behalf of OptimEx study group

**Funding Acknowledgement:** Type of funding sources: Public grant(s) – EU funding. Main funding source(s): EU Framework Programme 7

**Background:** Exercise training improves peak oxygen uptake (VO<sub>2</sub>) in heart failure with preserved ejection fraction (HFpEF), but the underlying mechanisms are unknown. In other cardiovascular diseases, exercise training improves vascular function and increases levels of circulating endothelium-repairing cells. We aimed to investigate the effects of moderate continuous training (MCT) and high intensity interval training (HIIT) on vascular function and cellular endothelial repair in HFpEF.

**Methods:** This was a prespecified subanalysis of the Optimizing Exercise Training in Prevention and Treatment of Diastolic Heart Failure randomized trial. HFpEF patients (n=180) were randomized to HIIT, MCT or attention control. At baseline and after 12 weeks, we measured peak VO<sub>2</sub>, fingertip arterial tonometry (n=109), brachial artery flow-mediated dilation (n=59), aortic pulse wave velocity (n=94), and flow cytometry (n=136) for endothelial progenitor cells (CD45dimCD34+VEGFR2+) and angiogenic T cells (CD3+CD31+CD184+). Changes in these parameters were compared between groups using linear mixed models. Parameters were correlated using Spearman's rho.

**Results:** At 3 months, we did not observe significant differences between HIIT, MCT and control group regarding changes in vascular function throughout the vascular tree (fingertip arterial tonometry, brachial artery flow-mediated dilation and central arterial stiffness, Table 1) or levels of circulating endothelium-repairing cells (endothelial progenitor cells and angiogenic T cells, Table 1). Results were similar at 12 months and when restricting analysis to patients with at least 70% adherence to training sessions. Patients with higher peak VO<sub>2</sub> at baseline had lower numbers of circulating endothelial progenitor cells (rho=-0.22, p=0.011).

**Conclusions:** In patients with HFpEF, exercise training did not change vascular function or levels of endothelium-repairing cells. Thus, improved vascular function likely does not contribute to the change in peak VO<sub>2</sub> after training. These findings are in contrast with the benefits of exercise on vascular function in heart failure with reduced ejection fraction and coronary artery disease.

| Change from baseline to 3 months, mean (SD)                          | HIIT         | MCT          | Control      | P value time:group interaction |
|----------------------------------------------------------------------|--------------|--------------|--------------|--------------------------------|
| Peak VO <sub>2</sub> (mL/kg/min)                                     | +1.1 (3.0)   | +1.6 (2.5)   | -0.6 (3.3)   | .001                           |
| Fingertip arterial tonometry (reactive hyperemia index)              | +0.07 (0.92) | +0.08 (0.75) | +0.05 (0.77) | .902                           |
| Brachial artery flow-mediated dilation (%)                           | +1.2 (4.5)   | -1.1 (2.3)   | +0.5 (4.2)   | .142                           |
| Aortic pulse wave velocity (m/s)                                     | -0.4 (1.0)   | -0.9 (2.6)   | -0.5 (1.2)   | .910                           |
| Endothelial progenitor cells (per 10 <sup>6</sup> mononuclear cells) | -2 (43)      | +14 (50)     | 0 (44)       | .197                           |
| Angiogenic T cells (per 10 <sup>6</sup> mononuclear cells)           | -90 (2301)   | +389 (2277)  | -47 (2499)   | .915                           |

Table 1
